# Supplementary material
Source: Springer Nature journal article supplement (https://www.springermedizin.de/resource/supplementary/12916_2006_91_MOESM5_ESM.pdf/9599156)
Supplement: MOESM5 [file 9599156]

control  
negative control  
green tea 5h  
green tea 5h + AP-1  
green tea 5h + NF-kB  
green tea 5h + anti-p50  
green tea 5h + anti-p65

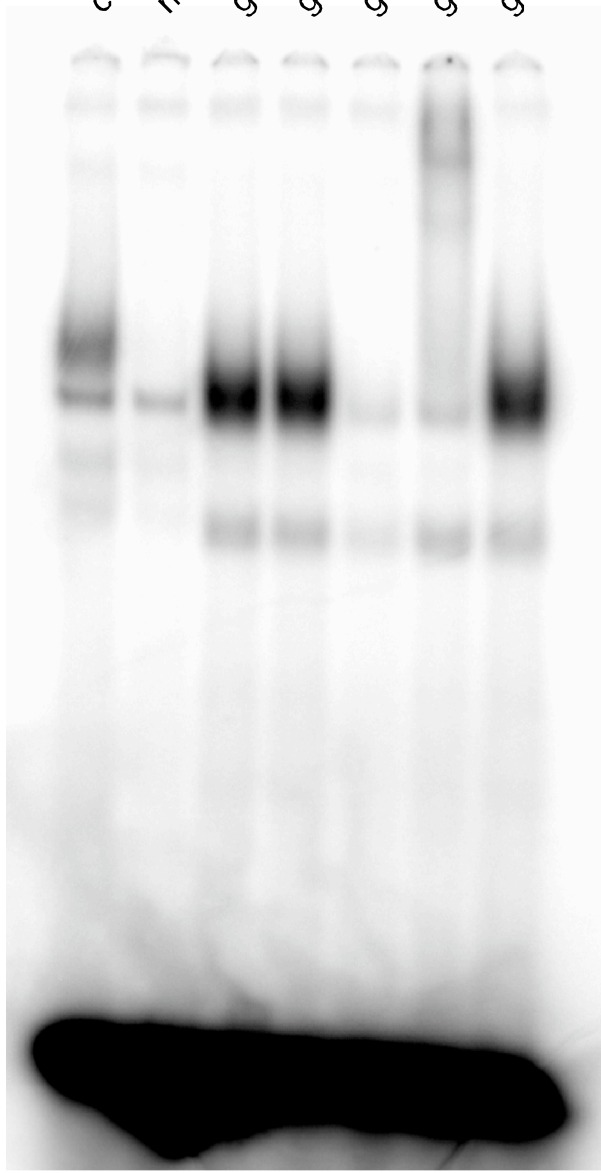

← NF-kB

← n.s.

← free oligonucleotide
